# Supplementary material for: Role of ring-enlargement reactions in the formation of aromatic hydrocarbons
Source: Royal Society of Chemistry journal article supplement (doi:10.1039/c9cp05854k), 2020-01-01
Supplement: c9cp05854k1.zip [file c9cp05854k1.zip]

## Sheet: IntermediateSpecies_FlameCP
Pos	C5H6	C2H2	C2H4	CH2O	C6H6	C6H8	C4H2	C4H4	C4H6	C4H8	C3H4	C3H6	C7H8	C8H6	C8H8	C9H8	C10H8	C8H10	signalC10H10	signalC12H8	signalC12H10	signalC11H10	signalC13H10	signalC14H10	signalC14H12	signalC15H10	Signalpyrene	signalC17H12	signalC6H10
4.5	0.00347227	0.00846748	0.00172927	4.07703e-05	0.000197184	4.54545e-05	0.000141028	6.20557e-05	0.000129223	8.68689e-05	7.33758e-05	0.00022156	2.89029e-05	3.89356e-05	5.01258e-05	2.5781e-05	2.60164e-05	2.82811e-05	0.324075	0.116368	0.0398463	0.125499	0.0619856	0.042754	0.0357778	0.029746	0.0294168	0.0141394	2.04969e-05
4.7	0.00409122	0.0103306	0.00196078	3.2755e-05	0.000270095	5.9825e-05	0.000182554	7.78358e-05	0.000165362	0.000120084	0.000210451	0.000369359	3.67652e-05	5.24571e-05	6.54901e-05	3.43461e-05	3.4735e-05	3.9237e-05	0.414634	0.148111	0.0457414	0.139817	0.0877187	0.0525362	0.0427555	0.0434177	0.0436126	0.0146325	2.24001e-05
4.9	0.00473334	0.0120595	0.00224059	4.68034e-05	0.000344142	7.81536e-05	0.000227929	9.7484e-05	0.000205766	0.000140755	0.000394954	0.000450193	4.65712e-05	6.42592e-05	8.30453e-05	4.43886e-05	4.59183e-05	4.98581e-05	0.462446	0.173919	0.0569174	0.175327	0.0934605	0.0530715	0.0489304	0.0377843	0.0581968	0.0173285	2.42325e-05
5.1	0.0053723	0.0141637	0.00260086	4.6062e-05	0.000427087	9.53179e-05	0.000271972	0.000120363	0.000264096	0.000180345	0.000611244	0.000485731	6.1097e-05	8.2981e-05	0.000106781	5.68099e-05	5.7777e-05	6.2051e-05	0.569188	0.207738	0.0715558	0.220824	0.114035	0.0738562	0.0537368	0.0561639	0.0618313	0.0255266	2.4509e-05
5.3	0.00608958	0.0159173	0.00285447	5.235e-05	0.000506996	0.000113362	0.000306377	0.000138385	0.000281137	0.000205307	0.000747266	0.000574385	7.35661e-05	9.74996e-05	0.000119257	6.76399e-05	6.74188e-05	7.50331e-05	0.654614	0.225198	0.0786321	0.236394	0.13195	0.0840492	0.0635227	0.0587634	0.0775477	0.028656	2.70536e-05
5.5	0.00666476	0.0173304	0.0031863	6.49739e-05	0.000577417	0.000133353	0.000339992	0.000152299	0.000318398	0.000229151	0.000924982	0.000644461	8.42602e-05	0.000111957	0.000138299	7.93193e-05	8.09744e-05	8.89135e-05	0.736055	0.258078	0.0825442	0.276962	0.154735	0.0995396	0.065797	0.0643345	0.087488	0.0340668	2.83551e-05
5.7	0.00721949	0.0193177	0.0034628	6.49437e-05	0.000672456	0.000153364	0.00037895	0.000178662	0.000371819	0.000266131	0.00111119	0.000626192	0.000100287	0.000128356	0.000159944	9.11488e-05	9.34092e-05	0.000101949	0.787661	0.27684	0.093032	0.298486	0.175715	0.101488	0.0703133	0.0764838	0.0878666	0.0387553	3.37799e-05
5.9	0.00781148	0.0204763	0.00372947	9.78405e-05	0.000757589	0.000172251	0.00043075	0.000192101	0.000405468	0.00031668	0.00125612	0.00066062	0.000117383	0.000147944	0.000176851	0.000101361	0.000101972	0.000113931	0.865505	0.312415	0.10186	0.340512	0.177784	0.115665	0.0752938	0.0832209	0.103137	0.0395619	3.53839e-05
6.1	0.00846369	0.0224425	0.00396444	8.26774e-05	0.000843095	0.000193064	0.0004583	0.000215772	0.000450012	0.000336546	0.00138378	0.000705517	0.000128272	0.000163039	0.000197717	0.000114607	0.000115405	0.000123206	0.916897	0.33558	0.118108	0.385938	0.207511	0.114151	0.0890617	0.0881625	0.102031	0.0418032	3.91073e-05
6.3	0.00885333	0.0234041	0.00418474	8.43483e-05	0.000911915	0.000208308	0.00047275	0.000230757	0.000468389	0.000350418	0.0015286	0.000736491	0.000140533	0.000173043	0.000207618	0.0001219	0.000123258	0.000134182	0.967534	0.363332	0.124627	0.397467	0.203811	0.140163	0.0818875	0.0946956	0.112653	0.0440619	4.38063e-05
6.5	0.00944135	0.0243553	0.00456869	9.96226e-05	0.000988608	0.000226316	0.000514241	0.000247508	0.000515004	0.000409975	0.00165144	0.000733358	0.000153313	0.000183098	0.000220103	0.000131228	0.000130794	0.000139895	0.984446	0.361065	0.127143	0.440416	0.227285	0.141634	0.0846786	0.109012	0.113436	0.0479655	4.5897e-05
6.7	0.00975907	0.0254176	0.00498505	0.000104258	0.00105018	0.000240208	0.00051595	0.000270897	0.000522638	0.000442505	0.00171971	0.000782569	0.000165757	0.000198327	0.000230364	0.00014058	0.00013944	0.000145599	1.04489	0.377201	0.131027	0.467966	0.230581	0.138433	0.0944089	0.107891	0.112943	0.0495199	5.08406e-05
6.9	0.0101767	0.0261517	0.00527063	0.000118253	0.00110769	0.000256869	0.000549463	0.000277868	0.000572007	0.000467396	0.00176398	0.00080473	0.000177393	0.00020602	0.000237192	0.000146633	0.0001428	0.000153182	1.05857	0.362948	0.133538	0.471436	0.244115	0.140187	0.0912161	0.107466	0.120382	0.0557698	5.29045e-05
7.1	0.0103762	0.0279328	0.00539702	0.000118538	0.0011881	0.000266857	0.000567409	0.000291473	0.000592228	0.000500577	0.00197251	0.00080862	0.000188702	0.000211546	0.000247587	0.000153715	0.000154604	0.000154273	1.0435	0.388709	0.132294	0.485924	0.242154	0.142174	0.090026	0.103373	0.119919	0.0498608	5.78784e-05
7.3	0.0104786	0.0279517	0.00565807	0.000152472	0.00120406	0.000275666	0.00057018	0.000305225	0.000606484	0.00052009	0.00198859	0.000883464	0.000190725	0.000212659	0.000242684	0.000157794	0.000151741	0.0001513	0.961831	0.361043	0.120349	0.466431	0.244019	0.135735	0.0770262	0.102137	0.115331	0.0495264	6.00465e-05
7.5	0.0103629	0.0290816	0.0058539	0.000150375	0.00123782	0.000278111	0.000570815	0.000319359	0.000621124	0.000527085	0.00195909	0.00087147	0.000201894	0.000220716	0.000239192	0.000157224	0.000157138	0.000149845	0.921398	0.348374	0.12426	0.493925	0.237967	0.133975	0.0712385	0.108683	0.115211	0.057898	5.64459e-05
7.7	0.010197	0.0306162	0.0059654	0.00016018	0.00127996	0.000283086	0.000591724	0.000333391	0.000644942	0.000517899	0.00198367	0.000909752	0.000209528	0.000220426	0.000239452	0.000166539	0.000162859	0.000139603	0.884345	0.361182	0.121707	0.469046	0.229885	0.131823	0.0684818	0.0977626	0.115047	0.0484138	6.18795e-05
7.9	0.00980736	0.0301442	0.00585757	0.000148789	0.0012844	0.000275238	0.0005947	0.000336661	0.000634819	0.000518064	0.00196756	0.000900065	0.00020295	0.000218585	0.000230213	0.000164106	0.000155364	0.000130806	0.820442	0.323019	0.113239	0.473935	0.225214	0.126111	0.0702762	0.105635	0.0546166	0.0462648	6.13319e-05
8.1	0.00894662	0.0300568	0.00583498	0.00016388	0.0012647	0.000259775	0.000576146	0.000333263	0.000626314	0.000467669	0.0019137	0.000861075	0.000199403	0.000207785	0.00021386	0.00015797	0.000151139	0.000115649	0.763985	0.332694	0.108853	0.442974	0.221021	0.119869	0.0701424	0.0946292	0.102117	0.0441633	5.81715e-05
8.3	0.00809519	0.0301352	0.00570268	0.000164413	0.00128462	0.000242591	0.000562164	0.000336642	0.000613154	0.000425024	0.001846	0.000806613	0.000193946	0.000204827	0.00019661	0.000153563	0.00014414	9.82249e-05	0.650198	0.29451	0.0992591	0.421699	0.195362	0.104715	0.057714	0.083762	0.0906585	0.04919	6.12064e-05
8.5	0.00713376	0.029626	0.00553459	0.000151286	0.00120601	0.000216061	0.00053628	0.000330038	0.000571605	0.000341578	0.00166616	0.000758581	0.000185821	0.000190114	0.000175439	0.000143706	0.000137984	8.03971e-05	0.562245	0.277855	0.0977232	0.382245	0.188254	0.103964	0.0579772	0.0742342	0.0823414	0.0432326	5.61683e-05
8.7	0.0058737	0.0283112	0.00512116	0.000185634	0.00115124	0.000187746	0.000523988	0.000309528	0.000535445	0.000293295	0.00150872	0.000651637	0.000170844	0.00017134	0.000155678	0.000131503	0.000127428	6.02281e-05	0.465202	0.265341	0.0829546	0.345507	0.156208	0.0900772	0.0448125	0.0674885	0.0766367	0.0381324	4.98114e-05
8.9	0.00472552	0.0287932	0.00462498	0.000213644	0.0010868	0.000156766	0.000492036	0.000302516	0.000492739	0.000215891	0.00139223	0.000516172	0.00015264	0.000153802	0.000134014	0.000125341	0.000112599	4.2353e-05	0.365994	0.214896	0.0746035	0.288136	0.150813	0.0882901	0.0441044	0.0669983	0.0642717	0.0354232	4.40509e-05
9.1	0.00362441	0.0260689	0.0041576	0.000191292	0.000945409	0.000120929	0.000452848	0.000273146	0.000416135	0.00014559	0.00115123	0.000406626	0.000129062	0.000132876	0.000101578	0.000105727	9.65856e-05	2.86344e-05	0.254221	0.190033	0.0605383	0.244937	0.130603	0.06725	0.0373311	0.0521081	0.0558411	0.0227195	3.73941e-05
9.3	0.00254325	0.0258144	0.0035496	0.000195585	0.000861486	9.08257e-05	0.00042481	0.0002457	0.000355513	9.6783e-05	0.000986875	0.000293275	0.000107831	0.000116335	8.41196e-05	9.33598e-05	8.44271e-05	2.15469e-05	0.176179	0.159924	0.0533767	0.199644	0.0951053	0.0661327	0.0317999	0.0458749	0.0498605	0.0250101	2.75145e-05
9.5	0.00164408	0.0235201	0.00297662	0.000164693	0.00069767	6.03216e-05	0.000370072	0.000202658	0.000282159	6.42449e-05	0.000819782	0.000195295	8.3593e-05	8.94439e-05	5.40817e-05	7.3392e-05	7.04078e-05	1.44257e-05	0.108699	0.143274	0.0385246	0.140263	0.0840276	0.0441985	0.0228318	0.0363783	0.0379343	0.0164965	2.32176e-05
9.7	0.000997784	0.0217286	0.00242868	0.000197537	0.00058364	3.75647e-05	0.000321899	0.000166132	0.000204907	3.79425e-05	0.000593557	0.000133044	6.42629e-05	7.10295e-05	3.70905e-05	5.58585e-05	5.65278e-05	8.40272e-06	0.067469	0.126402	0.0312724	0.114413	0.0690781	0.0374683	0.0193269	0.0307052	0.0337039	0.0161125	1.63718e-05
9.9	0.000564404	0.018657	0.0018116	0.000176725	0.000439906	2.07827e-05	0.000250372	0.000124904	0.000143008	2.75061e-05	0.000461992	8.1474e-05	4.54208e-05	4.95424e-05	2.44549e-05	4.03412e-05	4.15384e-05	5.63315e-06	0.0395067	0.0783851	0.0259304	0.0713654	0.0507692	0.0309548	0.0163376	0.0212064	0.0268653	0.0134283	1.24332e-05
10.1	0.000271226	0.0161619	0.00138378	0.000171674	0.000315093	1.04669e-05	0.000198765	8.64898e-05	8.84602e-05	1.8936e-05	0.000315473	5.03146e-05	2.97889e-05	3.21798e-05	1.4204e-05	2.58658e-05	2.813e-05	3.21817e-06	0.0204854	0.0663921	0.0230202	0.0393535	0.033904	0.0218986	0.0128305	0.0178475	0.0237745	0.00893502	8.4437e-06
10.3	0.000101096	0.0125911	0.000892968	0.000170578	0.000204018	3.64921e-06	0.000138759	1.76591e-05	5.04133e-05	1.12377e-05	0.000215554	2.55751e-05	1.83946e-05	1.92821e-05	7.10328e-06	1.56573e-05	1.68114e-05	2.92668e-06	0.0131708	0.040456	0.0121268	0.0265089	0.0236743	0.0128252	0.0140154	0.0118664	0.0139708	0.00933356	5.9154e-06
10.5	3.51903e-05	0.0102019	0.000595026	0.000178447	0.000119623	1.51533e-06	8.77517e-05	2.50662e-05	2.09003e-05	1.12763e-05	0.000141522	2.04849e-05	9.13775e-06	1.14002e-05	3.59307e-06	9.2506e-06	8.43989e-06	1.5286e-06	0.00661755	0.0226136	0.0107143	0.0149676	0.0159859	0.0110501	0.00743727	0.00669648	0.0098221	0.00791463	3.60162e-06
10.7	9.34756e-06	0.00686966	0.000361852	0.000131881	6.50841e-05	6.45481e-07	5.14258e-05	1.16841e-05	7.99751e-06	7.2949e-06	0.00011762	1.24073e-05	4.29348e-06	4.09302e-06	1.64205e-06	3.35947e-06	5.39329e-06	9.64903e-07	0.00631464	0.0188972	0.00953926	0.0114366	0.00864375	0.00678169	0.00600608	0.00611657	0.0085118	0.00514608	3.01191e-06
10.9	4.51649e-06	0.00496727	0.000263163	0.000124465	3.06011e-05	3.21875e-07	2.23743e-05	4.06412e-06	3.81611e-06	9.88826e-06	7.59541e-05	1.37327e-05	2.5094e-06	1.67111e-06	1.47384e-06	2.20549e-06	3.27565e-06	1.27743e-06	0.00549365	0.0096356	0.00777607	0.00681473	0.00724795	0.0050738	0.00680048	0.0038239	0.00723624	0.00480576	2.38974e-06
11.1	3.23574e-06	0.00275693	6.80644e-05	8.84133e-05	1.54025e-05	3.32425e-07	8.34004e-06	1.35738e-06	1.62777e-06	1.03687e-05	6.69142e-05	1.39376e-05	1.16947e-06	1.03779e-06	1.09371e-06	1.28533e-06	1.54468e-06	8.9216e-07	0.00665401	0.00800226	0.00534614	0.00447577	0.00948345	0.00607261	0.00761933	0.00406694	0.00632452	0.00376753	2.48942e-06
11.3	1.917e-06	0.00149704	9.19425e-05	4.69564e-05	7.91401e-06	2.33939e-07	1.57486e-06	3.35431e-07	1.02882e-06	8.03433e-06	6.24811e-05	1.23001e-05	1.09656e-06	9.519e-07	8.62756e-07	8.3647e-07	1.08283e-06	1.11182e-06	0.00420192	0.00602585	0.00650046	0.0057309	0.00758124	0.00744577	0.00632973	0.00312247	0.0042573	0.00341284	1.76547e-06
11.5	1.12552e-06	0.000833731	7.73051e-05	3.32632e-05	3.69488e-06	3.22297e-07	3.88427e-07	3.29509e-07	1.41885e-06	7.31607e-06	6.10373e-05	9.24156e-06	9.01675e-07	3.05182e-07	6.14579e-07	6.42988e-07	1.06444e-06	3.97169e-07	0.00490333	0.00678554	0.00634901	0.00382752	0.00626524	0.00685475	0.00651474	0.00422002	0.00259512	0.00219446	2.11398e-06
11.5	1.42299e-06	0.000315365	5.97247e-05	2.29102e-05	2.33363e-06	4.18358e-07	1.82596e-07	1.18802e-07	8.97195e-07	8.13147e-06	6.31036e-05	1.03303e-05	8.24754e-07	5.63553e-07	5.52143e-07	5.73711e-07	7.36256e-07	4.25083e-07	0.00367053	0.0074783	0.00772664	0.00593866	0.0080885	0.00683973	0.00725559	0.00263028	0.00307336	0.00193039	1.9009e-06
11.75	1.64647e-06	0.000126206	3.54207e-05	2.05586e-05	1.03876e-06	2.34802e-07	1.36553e-07	1.77642e-07	1.01547e-06	6.58746e-06	6.02066e-05	7.10668e-06	4.19929e-07	5.79776e-07	4.93551e-07	5.98833e-07	9.15972e-07	7.2156e-07	0.00295168	0.00561496	0.00569637	0.00422502	0.00817278	0.00648859	0.0060679	0.00371864	0.00421434	0.00261024	1.67323e-06
12	1.74516e-06	4.77302e-05	4.89375e-05	2.25242e-05	1.53612e-06	2.60464e-07	2.38218e-07	1.0273e-07	4.65847e-07	7.04766e-06	6.18995e-05	7.61468e-06	4.00681e-07	2.45311e-07	4.96716e-07	6.0113e-07	9.21599e-07	5.90848e-07	0.00326388	0.00833711	0.00819089	0.00540036	0.00806632	0.00629559	0.00531677	0.00353797	0.00265931	0.00245646	2.10648e-06
12.25	1.17726e-06	3.49895e-05	3.16524e-05	8.94361e-06	2.1503e-06	3.1983e-07	6.09853e-09	3.27505e-09	8.69465e-07	6.65482e-06	6.66638e-05	6.52229e-06	4.62585e-07	6.76644e-07	7.2575e-07	7.33956e-07	1.12612e-06	5.14528e-07	0.00434399	0.00517618	0.00708903	0.00329507	0.00762324	0.00860026	0.00710327	0.003209	0.00377137	0.0012253	1.85297e-06
12.5	1.13358e-06	2.118e-05	4.01447e-05	8.86102e-06	1.25512e-06	2.01323e-07	1.38707e-07	6.99577e-08	8.08285e-07	5.2551e-06	6.06448e-05	5.85499e-06	3.80748e-07	4.12457e-07	8.61402e-07	6.93479e-07	8.70073e-07	3.47854e-07	0.00220285	0.00595628	0.00635352	0.00338055	0.0107448	0.00612035	0.0070903	0.00395913	0.00415399	0.00282659	1.47583e-06
12.75	1.43001e-06	1.67603e-05	4.15345e-05	7.88852e-06	1.80345e-06	2.17073e-07	2.69657e-07	7.09971e-08	5.21104e-07	7.90152e-06	7.12083e-05	7.1865e-06	8.25213e-07	4.54962e-07	4.13637e-07	6.76991e-07	9.73127e-07	9.12718e-07	0.00399553	0.00706517	0.0055144	0.00563757	0.00618749	0.00540963	0.0063635	0.00448775	0.00374472	0.0026922	1.93009e-06
13	1.03375e-06	1.10871e-05	3.08894e-05	1.13758e-05	1.83946e-06	1.45348e-07	1.3632e-07	1.69582e-07	8.01751e-07	6.60051e-06	5.87351e-05	9.14455e-06	7.47898e-07	8.33779e-07	5.63502e-07	9.13468e-07	1.15565e-06	2.26006e-07	0.00267773	0.00755801	0.00779261	0.00589142	0.00709072	0.00458321	0.00477125	0.00398845	0.00496429	0.00136463	1.84701e-06
13.25	1.59685e-06	0	3.07488e-05	1.72714e-05	1.92119e-06	2.20531e-07	2.60803e-07	2.15777e-07	1.09039e-06	8.3761e-06	6.70796e-05	7.32393e-06	5.1684e-07	7.01899e-07	5.6085e-07	7.55343e-07	1.10722e-06	4.49272e-07	0.00350601	0.00670447	0.00648374	0.00435519	0.00725475	0.00518782	0.00665744	0.00276656	0.00393739	0.00275366	1.79386e-06
13.5	1.482e-06	5.94418e-06	3.55702e-05	8.45106e-06	1.46699e-06	1.31303e-07	0	4.98278e-08	1.21376e-06	8.82205e-06	6.2623e-05	1.10334e-05	5.24537e-07	3.15663e-07	7.28312e-07	6.72437e-07	1.22261e-06	4.18569e-07	0.00294122	0.00763461	0.00621761	0.0029968	0.00707407	0.0076474	0.00780604	0.00317506	0.00413587	0.00211509	2.19712e-06
13.75	1.38185e-06	1.18363e-05	4.49491e-05	1.28354e-05	1.63833e-06	2.08008e-07	1.17592e-09	1.70632e-07	7.89389e-07	6.38175e-06	5.86781e-05	7.89627e-06	7.39265e-07	4.54772e-07	7.78351e-07	4.85599e-07	1.02384e-06	5.82853e-07	0.00280605	0.0072761	0.00689772	0.00697359	0.00752417	0.00616627	0.00519343	0.00256174	0.00576024	0.0021878	1.69854e-06
14	8.61777e-07	2.78557e-06	2.93194e-05	7.37624e-06	1.87888e-06	2.23764e-07	7.26336e-08	0	1.04677e-06	5.37025e-06	5.69669e-05	1.074e-05	4.39646e-07	2.9598e-07	6.18426e-07	6.63415e-07	1.04073e-06	7.68447e-07	0.00455844	0.00666506	0.00521401	0.00354007	0.00752955	0.00493613	0.00388775	0.0054033	0.00176844	0.00253646	1.8253e-06
14.25	1.68297e-06	9.11103e-06	3.44719e-05	6.4524e-06	1.86979e-06	2.84578e-07	1.4911e-07	1.18942e-07	1.07035e-06	6.17908e-06	6.5246e-05	1.0242e-05	4.34252e-07	5.72259e-07	4.22666e-07	7.14078e-07	1.16489e-06	5.45909e-07	0.00481914	0.00719562	0.00655875	0.00250174	0.0083625	0.00515795	0.00696666	0.00184986	0.00247475	0.00239371	1.86923e-06
14.5	1.26226e-06	5.62845e-06	2.69206e-05	9.69215e-06	1.98621e-06	2.09896e-07	1.65921e-07	8.58564e-11	7.23057e-07	6.60905e-06	6.65907e-05	1.25289e-05	4.3743e-07	3.45665e-07	6.61837e-07	5.55298e-07	1.27336e-06	3.74776e-07	0.00179587	0.00620686	0.00563127	0.00310309	0.00815309	0.00618347	0.00510606	0.00241653	0.00480743	0.00194635	2.30692e-06
14.75	1.35402e-06	4.12234e-06	2.29855e-05	1.28776e-05	1.74834e-06	1.63744e-07	1.69306e-07	4.28638e-08	1.0137e-06	6.18875e-06	6.56135e-05	9.08553e-06	3.29554e-07	3.88141e-07	7.05579e-07	9.2513e-07	1.35182e-06	4.57247e-07	0.00428075	0.00544558	0.00648969	0.00240697	0.00623127	0.0070684	0.00616566	0.00178525	0.00338753	0.000651255	2.27102e-06
15	1.78507e-06	9.09828e-06	2.82265e-05	1.52471e-05	2.07784e-06	2.01663e-07	2.11865e-07	1.28629e-08	4.60171e-07	8.81897e-06	5.94501e-05	8.25466e-06	5.94488e-07	4.87525e-07	5.59654e-07	6.56682e-07	1.30823e-06	5.76138e-07	0.00362177	0.00787374	0.00579803	0.00470749	0.00682238	0.00480722	0.00637949	0.00202981	0.00331522	0.00285877	1.49224e-06
15.25	1.18319e-06	1.04578e-05	3.12206e-05	1.49994e-05	1.26564e-06	1.93209e-07	3.8757e-12	2.82881e-12	6.1978e-07	7.43866e-06	6.64642e-05	7.36768e-06	3.86323e-07	3.90382e-07	4.21193e-07	6.62729e-07	7.0909e-07	5.53747e-07	0.00339282	0.00579159	0.00774869	0.00388605	0.00717169	0.00531715	0.00553234	0.00225171	0.00396559	0.00289202	2.30844e-06
15.5	1.84822e-06	4.64352e-06	2.76161e-05	1.26358e-05	1.85564e-06	3.03039e-07	3.25191e-07	3.0317e-07	1.92565e-06	9.61904e-06	6.61686e-05	7.28903e-06	4.22655e-07	2.73905e-07	5.94682e-07	1.27862e-06	1.48064e-06	4.96e-08	0.0052095	0.00750507	0.00543375	0.00365583	0.00859395	0.00565864	0.00397117	0.00281678	0.00195467	0.00213858	2.05387e-06
15.75	1.62086e-06	4.24398e-06	3.24246e-05	1.29705e-05	1.01532e-06	2.84896e-07	1.71677e-07	1.36925e-07	1.15557e-06	5.20102e-06	6.25221e-05	7.55278e-06	4.34426e-07	4.82694e-07	1.09086e-06	6.54093e-07	1.0846e-06	3.88509e-07	0.00166979	0.00695071	0.00693852	0.00246347	0.00692853	0.00404968	0.00630698	0.00229358	0.00280229	0.00208872	2.4834e-06
16	1.50174e-06	4.27253e-06	2.10801e-05	1.47508e-05	1.56315e-06	3.54164e-07	1.75474e-07	2.16137e-07	1.53874e-06	9.32554e-06	6.10229e-05	1.05241e-05	5.7995e-07	6.85037e-07	5.77529e-07	8.52633e-07	1.00531e-06	7.42801e-07	0.00386381	0.00644059	0.00625275	0.00483718	0.00694365	0.00386717	0.00468152	0.00254194	0.0039043	0.00278665	1.92379e-06
16.25	1.13271e-06	1.53029e-05	3.87901e-05	1.13449e-05	2.57944e-06	4.81838e-07	6.7107e-08	3.3997e-07	1.12707e-06	7.17308e-06	6.86544e-05	9.82915e-06	4.94196e-07	6.73122e-07	7.78555e-07	5.24858e-07	1.60162e-06	1.05675e-07	0.00363179	0.00513861	0.0050897	0.00477186	0.00691126	0.00391417	0.00411951	0.00128748	0.00364904	0.0019765	1.99352e-06
16.5	1.38906e-06	1.85092e-05	3.02665e-05	1.17056e-05	1.81986e-06	2.99876e-07	2.16947e-07	1.87256e-07	1.34519e-06	7.38902e-06	5.99582e-05	7.97742e-06	6.31235e-07	5.50511e-07	4.43945e-07	8.12243e-07	1.00579e-06	6.29429e-07	0.00435174	0.00601389	0.00539956	0.0031528	0.00631858	0.00390614	0.00609394	0.000557734	0.00372179	0.00203396	2.34829e-06
16.75	1.12343e-06	9.53927e-06	2.29315e-05	1.46544e-05	2.33149e-06	3.38304e-07	2.90597e-09	2.73794e-08	7.49662e-07	9.51793e-06	6.31802e-05	7.18529e-06	5.30131e-07	7.75793e-07	2.05607e-07	8.445e-07	1.03358e-06	3.84931e-07	0.00377345	0.00672372	0.00495781	0.00316215	0.00619839	0.00537301	0.00466955	0.003223	0.00398739	0.00141652	2.18318e-06
17	1.57792e-06	1.54496e-05	2.03976e-05	9.31787e-06	1.8112e-06	2.84347e-07	6.89485e-08	2.29338e-10	9.9007e-07	5.75495e-06	6.39376e-05	5.4575e-06	5.9978e-07	5.16251e-07	9.93036e-07	8.60021e-07	1.21915e-06	1.02911e-07	0.00263033	0.00775724	0.00452215	0	0.00742159	0.00486611	0.0065069	0.00318407	0.00425215	0.00385617	2.12884e-06
17.25	2.69143e-06	9.91946e-06	7.82695e-09	1.78314e-05	1.9323e-06	3.47874e-07	1.0513e-07	2.91626e-07	8.60928e-07	9.33317e-06	6.77856e-05	1.28108e-05	1.70324e-07	6.78418e-07	1.68321e-07	8.23335e-07	1.32125e-06	2.5523e-07	0.00376035	0.00625353	0.00659756	0.00439126	0.00855663	0.00487257	0.00562726	0.00310373	0.00412487	0.00232031	2.05336e-06

## Sheet: MainSpecies_FlameCP
Position	C5H8	CO	CO2	O2	H2O	C5H6	Ar
4.5	0.0966077	0.0221295	0.0111979	0	0.0267189	0.00465938	0.799361
4.7	0.0938663	0.0232562	0.0136606	0.000195438	0.0293095	0.00572735	0.791745
4.9	0.0890199	0.0265726	0.0164916	-0.000302323	0.0318074	0.00694709	0.784201
5.1	0.0845468	0.0286476	0.0189169	-0.00174817	0.0343283	0.0082447	0.778846
5.3	0.0792155	0.0349449	0.020467	7.17621e-05	0.0367766	0.00953809	0.768012
5.5	0.0779484	0.0399775	0.0230426	-0.00249863	0.0393558	0.0109345	0.757431
5.7	0.0673461	0.04031	0.0252037	-0.00192101	0.0420331	0.0123339	0.758102
5.9	0.0620855	0.0439998	0.0283722	-0.00112395	0.0447249	0.0136539	0.74898
6.1	0.0573096	0.0462682	0.031454	-0.00183901	0.0476486	0.014905	0.741951
6.3	0.0542968	0.0489165	0.0340785	-0.00265034	0.0501752	0.0156037	0.734736
6.5	0.0448455	0.0531965	0.0388444	-0.00189239	0.0529282	0.0156995	0.728875
6.7	0.0391129	0.0615324	0.0399615	-0.00332756	0.055844	0.0148773	0.722001
6.9	0.0345098	0.0599879	0.0442618	-0.00329598	0.0584923	0.013265	0.720684
7.1	0.0297251	0.0665242	0.044301	-0.00290734	0.0614582	0.0102809	0.716152
7.3	0.0232229	0.0646865	0.0498217	-0.00351067	0.0642456	0.0067561	0.718217
7.5	0.019219	0.069651	0.0514019	-0.00197708	0.0670823	0.00331773	0.712917
7.7	0.0159622	0.0763726	0.0559656	-0.00311763	0.0700113	0.00114262	0.704259
7.9	0.0103936	0.0763897	0.0569055	-0.00121366	0.073051	0.000263453	0.704986
8.1	0.00763377	0.0775788	0.0586627	8.75757e-05	0.0760571	3.78327e-05	0.702147
8.3	0.00501635	0.0846528	0.0608794	-0.000869923	0.0790081	2.43715e-06	0.696205
8.5	0.00331978	0.0847317	0.0634733	-0.000801032	0.0819542	4.34811e-08	0.696374
8.7	0.00210592	0.0833901	0.0618994	0.00260415	0.0850783	3.17755e-09	0.699184
8.9	0.00109053	0.080468	0.0698071	0.00130217	0.0884735	8.56433e-10	0.698333
9.1	0.000590262	0.0837598	0.0699361	0.00269891	0.0911658	3.91842e-10	0.694826
9.3	0.000262275	0.0870183	0.0729684	0.00433926	0.0941534	2.18768e-10	0.687182
9.5	0.000107378	0.0930529	0.0719206	0.00265028	0.0973953	1.60433e-10	0.682861
9.7	6.48288e-05	0.092687	0.0760397	0.00494568	0.100007	1.49389e-10	0.675252
9.9	5.15195e-05	0.0879873	0.0763854	0.00521677	0.103575	1.62251e-10	0.676499
10.1	2.11843e-05	0.0903451	0.0782692	0.00663014	0.1061	1.93007e-10	0.668501
10.3	1.19964e-05	0.0907357	0.0786024	0.00861533	0.108346	2.51397e-10	0.663443
10.5	3.98359e-06	0.0943914	0.0822092	0.0103881	0.110904	4.22496e-10	0.65137
10.7	9.95239e-06	0.0812705	0.0822992	0.01704	0.112485	7.60335e-10	0.655582
10.9	1.05837e-05	0.0880443	0.0829722	0.0192581	0.114114	2.97197e-09	0.643541
11.1	6.24274e-06	0.0823529	0.0854825	0.0244553	0.114959	1.05633e-08	0.641227
11.3	6.08837e-06	0.071814	0.085975	0.0292874	0.115418	2.93543e-08	0.647931
11.5	6.54431e-06	0.0695374	0.0862785	0.032206	0.115429	4.48491e-08	0.649029
11.5	2.99342e-06	0.072475	0.0838053	0.0337153	0.115429	4.48491e-08	0.647058
11.75	3.81669e-06	0.0651305	0.0837615	0.0405784	0.115063	4.67173e-08	0.650688
12	6.81917e-06	0.056154	0.0842373	0.0503014	0.114009	2.55192e-08	0.654025
12.25	0	0.0562139	0.082762	0.0586068	0.113076	1.46663e-08	0.650061
12.5	9.22851e-06	0.0474623	0.0851853	0.0669802	0.111811	7.58104e-09	0.651362
12.75	9.99773e-06	0.0464326	0.0780241	0.0758586	0.11026	3.71739e-09	0.654398
13	1.24345e-10	0.0390075	0.0797583	0.0845498	0.10663	8.59522e-10	0.659644
13.25	6.93182e-06	0.0342151	0.075813	0.0954765	0.10464	4.09828e-10	0.661909
13.5	1.29225e-05	0.0329491	0.0736785	0.10673	0.102553	1.91392e-10	0.658745
13.75	9.80749e-06	0.0296069	0.0704329	0.116268	0.100382	8.55783e-11	0.660711
14	8.44865e-06	0.025559	0.0671141	0.126965	0.0981323	3.55238e-11	0.662484
14.25	6.35031e-06	0.0229832	0.0619073	0.135074	0.0957903	1.31436e-11	0.667431
14.5	3.15474e-06	0.0241031	0.0618478	0.140859	0.0933216	4.07947e-12	0.666012
14.75	5.50198e-06	0.0187385	0.0545207	0.157692	0.0906919	9.67499e-13	0.6674
15	7.47421e-06	0.0158047	0.0517256	0.167874	0.0878946	1.61532e-13	0.668424
15.25	2.89225e-06	0.0143802	0.0488802	0.175035	0.0849583	2.38369e-14	0.670709
15.5	2.79806e-06	0.0138126	0.0447485	0.184668	0.0819275	4.21869e-15	0.670451
15.75	6.56828e-06	0.0101037	0.0411324	0.199349	0.0788341	1.04584e-15	0.667267
16	6.06793e-06	0.0041985	0.037307	0.204895	0.075684	4.0275e-16	0.675297
16.25	3.68613e-06	0.00720141	0.0330465	0.21556	0.0724555	2.75266e-16	0.669611
16.5	7.66594e-06	0.00716578	0.0300057	0.225664	0.069102	3.3459e-16	0.666322
16.75	4.00292e-07	0.00630185	0.0265722	0.231859	0.0655638	5.3796e-16	0.668296
17	5.38571e-06	0.0121501	0.0223705	0.238562	0.0617881	8.80351e-16	0.663989
17.25	1.02194e-06	0.00494601	0.0202372	0.245858	0.0577459	1.30211e-15	0.670289
17.5	0	0.00330596	0.0163926	0.254739	0.0534327	1.60875e-15	0.671353

## Sheet: MainSpecies_FlameCPME
Position	C5H8	CO	CO2	H2O	O2	CH4	C5H6	Ar
4.5	0.101602	0.0149133	0.010143	0.0298731	0	0.0626245	0.00245021	0.74001
4.7	0.101189	0.0184933	0.0115734	0.0329521	-0.000880644	0.0587968	0.00306114	0.733713
4.9	0.0940052	0.0199014	0.01436	0.0359843	-0.00198841	0.0575741	0.00373009	0.73265
5.1	0.0903175	0.022807	0.0164948	0.0387824	-0.000429557	0.0550276	0.00440691	0.726328
5.3	0.0858946	0.0251697	0.0181614	0.0421168	-0.00102975	0.0506686	0.00528746	0.7245
5.5	0.0810387	0.0333665	0.0208076	0.0451171	-0.00233297	0.0496551	0.00614575	0.714296
5.7	0.0762262	0.0390713	0.0230543	0.0484181	-0.000934404	0.046298	0.00716166	0.705848
5.9	0.0716163	0.0410985	0.0268013	0.0515068	-0.00270105	0.0438118	0.00817747	0.702062
6.1	0.0669448	0.0484269	0.0291571	0.054717	-0.00145338	0.0429713	0.00929335	0.689424
6.3	0.0615061	0.0503597	0.0306445	0.0578797	-0.00372056	0.0397173	0.0104421	0.689785
6.5	0.0554043	0.056537	0.0338271	0.0613517	-0.00194579	0.0392216	0.0117276	0.67732
6.7	0.0501618	0.0608251	0.0383666	0.0647576	-0.00284258	0.0358384	0.0129393	0.670266
6.9	0.0474032	0.0598736	0.0394183	0.0677289	-0.00489422	0.0336464	0.0138469	0.670543
7.1	0.0380844	0.0584319	0.0417413	0.0710525	-0.00371291	0.0316777	0.014503	0.672723
7.3	0.0335157	0.0637808	0.0458065	0.0745277	-0.00295585	0.0287843	0.0144849	0.663401
7.5	0.0283491	0.0798104	0.0495704	0.0778031	-0.0051644	0.0270382	0.0135226	0.647544
7.7	0.024336	0.0679459	0.0509922	0.0810259	-0.00303999	0.024264	0.0115736	0.658708
7.9	0.0201255	0.0670588	0.0554942	0.084183	-0.00310136	0.0226388	0.00890541	0.65809
8.1	0.0151355	0.070479	0.0563305	0.0874306	-0.00254921	0.0214679	0.00590814	0.656971
8.3	0.0119612	0.0697151	0.0611214	0.0906466	-0.00303304	0.0189835	0.00332397	0.656602
8.5	0.00883925	0.0918793	0.0620555	0.0940251	-0.00335506	0.0181837	0.00147165	0.634808
8.7	0.00609042	0.089248	0.0645649	0.0972199	-0.00228407	0.0163006	0.000544257	0.635556
8.9	0.00413215	0.0936546	0.0666098	0.10073	-0.0016377	0.0145028	0.000137939	0.629241
9.1	0.00280954	0.0914415	0.0685923	0.103883	-0.00204867	0.0134231	3.03513e-05	0.630104
9.3	0.00171055	0.103447	0.0691306	0.107687	-0.00108956	0.0123189	3.20316e-06	0.616862
9.5	0.000986293	0.0967374	0.071982	0.110948	0.000187015	0.00998112	3.11662e-07	0.621364
9.7	0.000470542	0.0954416	0.0754819	0.113864	0.000290904	0.00944238	3.58091e-08	0.61943
9.9	0.000247476	0.0926467	0.0764896	0.117002	0.00178252	0.00737941	7.33272e-09	0.621577
10.1	0.000123054	0.101828	0.0776675	0.120336	0.00368157	0.0064758	2.82362e-09	0.610154
10.3	2.59049e-05	0.100581	0.0788164	0.123815	0.00224617	0.00534499	1.24927e-09	0.612908
10.5	5.73117e-05	0.101309	0.0788119	0.126475	0.00472799	0.00407963	7.10141e-10	0.610992
10.7	3.10449e-05	0.0830855	0.0831694	0.130023	0.00709696	0.00361595	3.68374e-10	0.623022
10.9	1.86827e-05	0.0958397	0.080607	0.132627	0.00803137	0.00283922	2.52069e-10	0.612613
11.1	4.63701e-06	0.0919531	0.082785	0.135099	0.0129898	0.00174539	1.96677e-10	0.610257
11.3	9.22912e-06	0.0770269	0.0872739	0.138035	0.0147445	0.00164616	1.76382e-10	0.618516
11.5	4.73627e-06	0.0846069	0.0857178	0.13991	0.0153506	0.0011795	1.90238e-10	0.611834
11.5	4.63821e-06	0.0769385	0.0871518	0.13991	0.0153843	0.000996911	1.90238e-10	0.618218
11.75	6.85124e-06	0.0881419	0.0875716	0.141462	0.0206805	7.41649e-06	2.36151e-10	0.601725
12	6.96868e-06	0.0855666	0.0869871	0.142531	0.0276582	0.000467919	3.55166e-10	0.597034
12.25	1.65945e-05	0.0732279	0.0864308	0.142696	0.0325851	9.6054e-05	5.47279e-10	0.605456
12.5	1.47985e-05	0.0697736	0.0855784	0.141963	0.0430131	1.22241e-05	1.0066e-09	0.600317
12.75	5.27312e-06	0.0596721	0.0852471	0.14106	0.0511275	6.40041e-05	1.47283e-09	0.603595
13	3.31736e-06	0.053465	0.0838269	0.139705	0.0615751	4.86885e-05	2.24602e-09	0.602305
13.25	3.53906e-06	0.0461775	0.0805982	0.137917	0.0722777	4.86885e-05	3.48299e-09	0.604167
13.5	9.44566e-06	0.0450073	0.0787292	0.135795	0.0798541	7.8068e-05	5.34493e-09	0.602106
13.75	6.27462e-06	0.0361181	0.0756681	0.13089	0.0894998	0.000125706	1.15318e-08	0.61048
14	1.37591e-05	0.0334707	0.0736532	0.12819	0.100484	3.31322e-05	1.6026e-08	0.607772
14.25	7.8671e-06	0.0300102	0.0681865	0.125359	0.109301	2.00974e-05	2.12805e-08	0.611713
14.5	3.7586e-06	0.0286211	0.0644517	0.122416	0.123466	4.44726e-05	2.67331e-08	0.606724
14.75	7.38369e-06	0.0234421	0.0610695	0.11937	0.135438	2.19342e-05	3.13471e-08	0.607655
15	5.8968e-06	0.0221516	0.0575565	0.116209	0.142163	4.77601e-05	3.36843e-08	0.610298
15.25	3.58793e-06	0.0203817	0.0516522	0.112907	0.153368	3.14707e-06	3.23347e-08	0.611709
15.5	2.42462e-06	0.0169357	0.0476842	0.109441	0.167166	1.9513e-09	2.69004e-08	0.610566
15.75	6.59604e-06	0.0148341	0.042949	0.10197	0.177152	3.63848e-05	1.12345e-08	0.61894
16	6.41846e-06	0.0112362	0.0392335	0.10197	0.183984	3.45184e-05	1.12345e-08	0.619424
16.25	3.42942e-06	1.64931e-09	0.036377	0.0979935	0.197995	0.000104435	5.79578e-09	0.62571
16.5	6.02628e-06	0.009669	0.0320289	0.0939019	0.200255	7.75991e-05	2.73524e-09	0.624664
16.75	8.71772e-06	0.00895192	0.0279872	0.0896972	0.209604	0.000105082	1.23715e-09	0.626772
17	7.47633e-06	0.00757598	0.024934	0.0853406	0.218048	3.40394e-05	5.51656e-10	0.629822
17.25	4.02828e-06	0.00486373	0.0217235	0.0807651	0.229528	3.38072e-08	2.44596e-10	0.631648
17.5	2.42631e-06	0.0049241	0.0186369	0.0758702	0.235567	0.000103345	1.06516e-10	0.636373

## Sheet: IntermediateSpecies_FlameCPME
Pos	C5H6	C2H2	C2H4	CH2O	C6H6	C6H8	C4H2	C4H4	C4H6	C4H8	C3H4	C3H6	C7H8	C8H6	C8H8	C9H8	C10H8	C8H10	signalC10H10	signalC12H8	signalC12H10	signalC11H10	signalC13H10	signalC14H10	signalC14H12	signalC15H10	Signalpyrene	signalC17H12	signalC6H10
4.5	0.00271953	0.00910556	0.00160756	3.96975e-05	0.000232255	5.55156e-05	0.000146741	7.11618e-05	0.000156257	0.000122054	0.000196743	0.00022156	2.64972e-05	3.29213e-05	3.71477e-05	2.19821e-05	2.42865e-05	2.07278e-05	0.216759	0.0903005	0.0350661	0.0912582	0.0505279	0.0302904	0.0252415	0.0193883	0.02633	0.0128101	2.31878e-05
4.7	0.00309505	0.0103518	0.00182794	2.70979e-05	0.000291139	7.02889e-05	0.000179216	8.57639e-05	0.000194922	0.000141322	0.000380558	0.000369359	3.59816e-05	4.54939e-05	4.91384e-05	2.79816e-05	3.15767e-05	2.58e-05	0.25009	0.109945	0.0354406	0.10391	0.0680512	0.0389662	0.0286242	0.0292869	0.0372827	0.0133934	2.52914e-05
4.9	0.00350287	0.0125236	0.00207145	3.10424e-05	0.000372142	8.79311e-05	0.000226434	0.000100865	0.000228646	0.000169802	0.000588186	0.000450193	4.49636e-05	5.36939e-05	5.80406e-05	3.51829e-05	3.96317e-05	3.3591e-05	0.314735	0.132312	0.0385424	0.129052	0.0708894	0.0485511	0.0352635	0.0351366	0.043375	0.0176016	3.03189e-05
5.1	0.00398945	0.0139684	0.00233941	5.37421e-05	0.000452036	0.000110747	0.000254968	0.00012261	0.000256636	0.000209434	0.000683395	0.000485731	5.62074e-05	6.60896e-05	7.48258e-05	4.39212e-05	4.94046e-05	4.24731e-05	0.364734	0.16782	0.0568177	0.16535	0.0883786	0.059738	0.0442283	0.0390437	0.0491994	0.0197806	3.22909e-05
5.3	0.00436601	0.0156729	0.00263558	5.28142e-05	0.000531324	0.000128889	0.000294116	0.00013481	0.000311245	0.000235722	0.000808582	0.000574385	6.73366e-05	7.7643e-05	8.89598e-05	5.34609e-05	5.93913e-05	4.8018e-05	0.415396	0.183212	0.0592628	0.183901	0.107771	0.0689478	0.0439023	0.0417326	0.064145	0.023638	3.2878e-05
5.5	0.00485916	0.0175952	0.00297069	5.78597e-05	0.00061791	0.00014791	0.000331526	0.00015709	0.000331636	0.000255952	0.000970967	0.000644461	7.91177e-05	9.18328e-05	0.000101403	6.20857e-05	7.07673e-05	5.86414e-05	0.473959	0.211744	0.0705945	0.22499	0.115839	0.0731653	0.0506918	0.0445104	0.067272	0.0269242	3.56818e-05
5.7	0.0053945	0.0190618	0.00334684	7.21896e-05	0.000701897	0.000169471	0.000361212	0.000169081	0.000376969	0.000305999	0.00113006	0.000626192	8.93717e-05	0.000102465	0.000115054	6.76411e-05	7.72073e-05	6.69539e-05	0.527992	0.224851	0.0762788	0.24695	0.135318	0.0817214	0.0587796	0.0533892	0.0767321	0.0297745	3.63523e-05
5.9	0.00597374	0.0203367	0.00358015	7.39404e-05	0.000800391	0.000197431	0.000402324	0.00019139	0.000419498	0.000340114	0.00122856	0.00066062	0.000104091	0.000112102	0.000131236	8.1582e-05	9.22176e-05	7.60926e-05	0.589621	0.250137	0.0824963	0.258938	0.139953	0.0862557	0.0566763	0.0621703	0.085307	0.0296538	4.29921e-05
6.1	0.00649504	0.0225	0.00401361	7.50285e-05	0.000882606	0.000222358	0.000431515	0.000210368	0.000459483	0.000372522	0.00135661	0.000705517	0.000117729	0.000127043	0.000146625	9.31998e-05	9.91833e-05	8.60194e-05	0.654067	0.272837	0.0921432	0.292411	0.158086	0.101875	0.0604597	0.0691056	0.083386	0.0347679	4.75356e-05
6.3	0.00704324	0.0239043	0.00430275	0.000110688	0.000972805	0.000247903	0.000467022	0.00022856	0.000505773	0.000418077	0.0015288	0.000736491	0.00013022	0.000146411	0.000160524	0.000101308	0.000110774	9.20061e-05	0.666796	0.297787	0.0940254	0.328385	0.166665	0.107914	0.0653989	0.0694065	0.0874127	0.0381496	5.36121e-05
6.5	0.00741521	0.0251165	0.00465	9.52066e-05	0.00107774	0.000273136	0.000499497	0.000250653	0.000537015	0.000478463	0.00160759	0.000782816	0.000145235	0.000157554	0.000170098	0.000110284	0.000118293	0.000103339	0.697211	0.31548	0.0954796	0.343277	0.184158	0.111687	0.0747237	0.0767658	0.106825	0.0359677	5.53018e-05
6.7	0.00766217	0.026924	0.00502116	9.0519e-05	0.00118797	0.000301947	0.000549405	0.000283072	0.000591271	0.000553522	0.00181042	0.000745448	0.000162134	0.000165861	0.000186496	0.000120923	0.000134292	0.000111051	0.727355	0.319726	0.106977	0.370139	0.190487	0.110736	0.0771147	0.0788568	0.0949085	0.0477417	6.54199e-05
6.9	0.00818936	0.0270412	0.00532115	0.000112973	0.00121436	0.000309295	0.000543717	0.000282319	0.000606587	0.000555883	0.00180656	0.000736572	0.000167616	0.000163964	0.000189776	0.000126625	0.00013494	0.000110579	0.761567	0.320104	0.117386	0.390722	0.189413	0.119505	0.0775333	0.0861661	0.1114	0.0456776	6.29007e-05
7.1	0.00838827	0.0284135	0.00562365	0.000106393	0.00130656	0.000336645	0.000585427	0.000300632	0.000634555	0.000621668	0.0019293	0.000750751	0.000182372	0.000181898	0.000203519	0.000130665	0.000144077	0.000112538	0.760826	0.351555	0.112998	0.395554	0.191818	0.121876	0.0770001	0.0810078	0.119971	0.0460703	7.01641e-05
7.3	0.00869872	0.0276714	0.00587874	0.000126741	0.00131547	0.000335276	0.000558021	0.000301438	0.000637013	0.000598359	0.00186529	0.000783982	0.000177132	0.000178132	0.000199082	0.000130747	0.000142699	0.000115326	0.760721	0.316555	0.114353	0.406049	0.193091	0.131711	0.0682361	0.0797887	0.109201	0.0482825	6.93933e-05
7.5	0.00881781	0.0295942	0.00596412	0.000135728	0.0014128	0.000355138	0.000598496	0.000321338	0.000671156	0.000661853	0.00198109	0.000750261	0.00019317	0.000198036	0.000207997	0.000141277	0.000150085	0.000118867	0.74197	0.324085	0.10834	0.414852	0.20472	0.123099	0.0742734	0.0832949	0.108563	0.0450948	7.18589e-05
7.7	0.00889009	0.0302124	0.0062643	0.000176629	0.00143357	0.00036004	0.000588989	0.000329541	0.000680154	0.000650409	0.00196493	0.000733808	0.000195382	0.000185811	0.000198915	0.000144218	0.00015009	0.000118083	0.751072	0.301656	0.112696	0.435165	0.18834	0.128581	0.0650125	0.0895257	0.102451	0.0418929	7.18509e-05
7.9	0.00877132	0.0309613	0.00651929	0.000136974	0.00148791	0.000368541	0.00062297	0.000354085	0.000710524	0.000675681	0.00205932	0.000758773	0.000211504	0.000200979	0.000213418	0.000144478	0.000152899	0.000115595	0.72767	0.318848	0.109294	0.427358	0.194513	0.118366	0.0668009	0.089985	0.0988797	0.0430714	7.62916e-05
8.1	0.00871164	0.0306413	0.00658841	0.000167164	0.00149415	0.000364801	0.000601329	0.000340345	0.000698341	0.000680326	0.00205157	0.000730211	0.000210139	0.000189338	0.000198443	0.000144544	0.000149518	0.000111215	0.64693	0.302043	0.105662	0.398149	0.185431	0.110092	0.0652784	0.0699896	0.10047	0.0413167	7.52887e-05
8.3	0.00829289	0.0319801	0.00678675	0.000185141	0.00153242	0.000363616	0.000605454	0.000350392	0.000706133	0.000678619	0.00205399	0.000755331	0.000214003	0.000192517	0.00020106	0.000145672	0.000150332	0.000107534	0.599808	0.297525	0.0957554	0.409621	0.186525	0.0983122	0.0612717	0.0732828	0.0884058	0.0483108	7.37941e-05
8.5	0.00789221	0.0322756	0.00682028	0.000185731	0.00153756	0.000353169	0.000603101	0.000353939	0.000693409	0.000632765	0.0020225	0.000747612	0.000215859	0.000183997	0.000186934	0.000141024	0.000148851	9.82766e-05	0.568375	0.287863	0.0979408	0.374044	0.178193	0.102869	0.0584253	0.07501	0.0830918	0.0381474	7.18195e-05
8.7	0.0073718	0.0315469	0.00663332	0.000192089	0.00146971	0.000320271	0.000596481	0.000353808	0.000676299	0.000565335	0.00186254	0.000717738	0.000209595	0.00017922	0.000172092	0.000139045	0.000140346	8.8207e-05	0.514801	0.270696	0.0837327	0.36722	0.172348	0.0989908	0.0600878	0.0638497	0.0916226	0.0365828	6.89846e-05
8.9	0.00660725	0.030715	0.00628082	0.000202229	0.00139424	0.000291932	0.000545785	0.000338736	0.000626934	0.000497275	0.00176739	0.00065784	0.000196785	0.000165483	0.000148142	0.000131397	0.00013448	6.59506e-05	0.440907	0.248239	0.0857516	0.349972	0.157924	0.0833429	0.0516664	0.066312	0.0723019	0.0333189	5.78446e-05
9.1	0.00564528	0.0303375	0.00609791	0.000191012	0.00137619	0.000263208	0.000555029	0.000320751	0.000605287	0.000404401	0.00164362	0.000579632	0.000188015	0.000156672	0.000135363	0.000123694	0.000125426	5.48721e-05	0.400304	0.237874	0.075403	0.335022	0.146974	0.0861404	0.0426829	0.0639275	0.0670326	0.0345238	5.37614e-05
9.3	0.004793	0.0300874	0.00597839	0.00018157	0.00127868	0.000226465	0.000537273	0.000311272	0.000565816	0.000321739	0.001513	0.000537496	0.00017558	0.000148172	0.000117024	0.000117461	0.000111633	4.5183e-05	0.312783	0.214659	0.0644897	0.300285	0.137199	0.075514	0.0390555	0.0581322	0.0663831	0.0321026	4.24053e-05
9.5	0.00374626	0.0293405	0.00534605	0.000242331	0.00117528	0.000185801	0.000495481	0.000290912	0.000483323	0.000237868	0.00138276	0.000432821	0.000165933	0.00012906	0.000100341	0.000101754	0.000106566	3.18034e-05	0.242141	0.186495	0.0705646	0.255919	0.116301	0.0730143	0.0297349	0.054389	0.0615246	0.0231822	4.43224e-05
9.7	0.00288917	0.0284074	0.0048857	0.000193651	0.00108092	0.000148044	0.00047284	0.000276455	0.00043362	0.000167673	0.00117873	0.00034981	0.000141508	0.00011656	7.94859e-05	9.55851e-05	9.36368e-05	2.55487e-05	0.17378	0.17749	0.0538377	0.225953	0.119203	0.064079	0.0334444	0.0492841	0.0613693	0.0265616	3.36295e-05
9.9	0.00209616	0.027494	0.00438832	0.000222182	0.000993975	0.000111408	0.000453824	0.0002516	0.000392307	0.000127868	0.00101936	0.000271463	0.000124281	0.000101063	6.65221e-05	8.5082e-05	8.64329e-05	1.98263e-05	0.129785	0.159778	0.051319	0.180545	0.0877191	0.0483883	0.024025	0.0384489	0.0512555	0.022245	2.70266e-05
10.1	0.00140219	0.0252177	0.00370753	0.000204682	0.000808364	7.15272e-05	0.000388103	0.000205122	0.000295421	7.14832e-05	0.000795234	0.000179569	9.75969e-05	8.15483e-05	4.51498e-05	6.23714e-05	6.44786e-05	1.40858e-05	0.0796277	0.120241	0.0350178	0.137249	0.0712454	0.0511971	0.0172453	0.0343922	0.0366223	0.0197065	2.05398e-05
10.3	0.000883668	0.0229275	0.00308572	0.000242971	0.000669236	4.76755e-05	0.000344844	0.000165766	0.000225145	4.88044e-05	0.000638152	0.000123311	7.89183e-05	6.62494e-05	3.14641e-05	5.25552e-05	5.53972e-05	1.04259e-05	0.0590969	0.109074	0.0289393	0.103403	0.0596944	0.0360555	0.0153452	0.028834	0.0327083	0.0179723	1.29694e-05
10.5	0.000529547	0.0207568	0.00255532	0.000219939	0.000547032	2.87089e-05	0.000288788	0.000135496	0.000158547	3.48732e-05	0.00048253	8.18531e-05	5.86759e-05	4.62616e-05	1.95004e-05	4.30624e-05	4.3737e-05	7.56234e-06	0.0387266	0.0782209	0.0252743	0.0792338	0.0444769	0.0285528	0.0162395	0.0198221	0.0240913	0.0153154	1.06177e-05
10.7	0.000282407	0.0178502	0.00203428	0.000224203	0.000411218	1.40052e-05	0.000235569	9.43678e-05	0.000112586	2.52562e-05	0.000368283	4.33384e-05	3.98535e-05	3.24941e-05	1.2319e-05	2.93243e-05	3.11682e-05	4.74985e-06	0.0225883	0.0644194	0.0194541	0.044096	0.0327614	0.0194569	0.0120143	0.0185055	0.0244648	0.00869738	8.52043e-06
10.9	0.000130342	0.015581	0.00148485	0.000206003	0.00028372	7.10885e-06	0.000184435	6.73619e-05	6.78096e-05	1.95793e-05	0.000255066	2.94039e-05	2.86615e-05	2.14809e-05	8.70964e-06	2.05218e-05	2.18341e-05	3.84969e-06	0.0178548	0.042823	0.0149888	0.0311366	0.022191	0.0157944	0.0131153	0.00957105	0.017289	0.00993458	5.93593e-06
11.1	4.87736e-05	0.0125922	0.0010556	0.000231229	0.000185322	3.4366e-06	0.000132802	3.88835e-05	3.63479e-05	1.35688e-05	0.000187398	1.48501e-05	1.52422e-05	1.36648e-05	3.76764e-06	1.25687e-05	1.2116e-05	1.92546e-06	0.00855038	0.0305306	0.0125684	0.0229278	0.0173467	0.0088218	0.00902809	0.00824953	0.0077388	0.00405612	3.87018e-06
11.3	2.5109e-05	0.00994994	0.000700949	0.000211603	0.000119035	1.78293e-06	9.7226e-05	2.02399e-05	1.90673e-05	1.46782e-05	0.000144856	1.08721e-05	1.07618e-05	7.86384e-06	3.19878e-06	6.08447e-06	9.36777e-06	1.68366e-06	0.00787852	0.0217959	0.0091091	0.0134258	0.013396	0.0114529	0.00779618	0.00751145	0.00985481	0.00484264	4.39652e-06
11.5	1.07595e-05	0.0074261	0.000447542	0.000160026	6.71366e-05	5.83181e-07	5.27872e-05	1.09992e-05	7.38671e-06	7.20775e-06	9.63911e-05	1.3291e-05	4.46789e-06	4.53544e-06	1.96664e-06	3.82284e-06	4.8154e-06	1.12435e-06	0.00498208	0.0146037	0.00602004	0.00693453	0.0103878	0.0103148	0.00812485	0.00428714	0.0101588	0.00521701	3.07993e-06
11.5	8.87196e-06	0.00447724	0.000290246	0.000145509	2.77422e-05	4.85453e-07	2.28263e-05	4.38218e-06	2.59701e-06	9.80591e-06	8.14861e-05	1.11359e-05	2.02968e-06	1.4789e-06	9.93051e-07	2.05902e-06	1.93726e-06	7.80033e-07	0.00558316	0.00962995	0.00630049	0.00701164	0.00864011	0.00725764	0.00513093	0.00448262	0.00215094	0.00378235	3.13077e-06
11.75	4.33915e-06	0.00245535	0.000158918	9.75554e-05	1.15187e-05	2.28777e-07	7.55084e-06	7.47944e-07	1.07154e-06	7.36534e-06	6.27011e-05	1.13578e-05	8.12013e-07	9.62908e-07	9.86951e-07	9.44988e-07	1.74495e-06	5.94389e-07	0.00446304	0.00616377	0.00523046	0.0049656	0.0085641	0.00696987	0.00548931	0.00335443	0.0061744	0.00484571	1.62888e-06
12	3.23496e-06	0.00118898	0.000101934	6.36073e-05	4.8853e-06	3.55957e-07	1.5243e-06	3.64675e-07	1.88106e-06	7.88949e-06	6.52494e-05	1.08239e-05	4.46949e-07	7.17258e-07	9.5984e-07	4.79217e-07	1.21664e-06	8.76505e-07	0.00335087	0.00766144	0.00928758	0.00439943	0.00720784	0.00724612	0.00893431	0.00403944	0.00409512	0.00324826	2.28517e-06
12.25	1.68288e-06	0.000442103	6.84457e-05	3.00947e-05	2.03572e-06	1.9373e-07	2.96288e-07	1.1375e-07	9.72308e-07	6.11996e-06	6.07759e-05	8.23405e-06	2.95421e-07	5.84154e-07	8.17341e-07	6.11586e-07	1.0727e-06	7.84881e-08	0.00538443	0.00955869	0.00501885	0.00552211	0.00701344	0.00628296	0.00584515	0.00256499	0.00495236	0.00278107	2.37834e-06
12.5	2.66684e-06	0.000243636	5.16022e-05	3.32918e-05	2.67858e-06	3.72397e-07	9.79912e-08	1.61043e-07	6.5214e-07	4.8664e-06	6.67664e-05	1.02658e-05	6.24716e-07	5.43521e-07	3.24e-07	8.1547e-07	1.023e-06	3.66978e-07	0.00326424	0.00573379	0.00796768	0.00511536	0.0070849	0.00725918	0.0053588	0.00259201	0.00457486	0.00238846	1.96098e-06
12.75	1.80746e-06	6.61203e-05	5.28202e-05	2.78365e-05	1.50444e-06	2.85378e-07	9.19996e-08	1.33062e-07	1.05541e-06	6.14976e-06	5.63484e-05	8.64109e-06	5.19228e-07	5.98212e-07	3.99613e-07	5.3858e-07	9.77852e-07	3.77975e-07	0.0040166	0.00610367	0.00803654	0.00359748	0.00844331	0.00502057	0.00736097	0.00414057	0.00431239	0.00439824	1.88252e-06
13	2.41928e-06	2.5341e-05	4.13147e-05	7.67193e-06	2.0019e-06	9.38048e-05	1.41029e-07	7.2979e-08	1.49934e-06	6.91012e-06	6.32881e-05	9.02657e-06	4.4456e-07	3.97362e-07	6.14988e-07	7.52739e-07	1.2885e-06	6.54981e-07	0.00465742	0.00916446	0.00780613	0.00528682	0.00860196	0.00639296	0.00528729	0.00301384	0.00385009	0.00284338	1.99387e-06
13.25	1.88869e-06	1.93645e-05	4.91405e-05	1.56741e-05	1.34011e-06	1.78324e-07	2.54983e-07	1.51436e-07	1.19624e-06	5.99745e-06	6.16525e-05	1.03708e-05	5.663e-07	4.04496e-07	4.40319e-07	7.36602e-07	9.35784e-07	4.3825e-07	0.00295571	0.00697829	0.00767179	0.00586867	0.00803753	0.00605725	0.00628872	0.00384503	0.00571301	0.00208048	1.96868e-06
13.5	6.53782e-07	1.36602e-05	3.96125e-05	1.1255e-05	1.24429e-06	2.47175e-07	5.01007e-08	9.19441e-08	4.1611e-07	7.40426e-06	6.23164e-05	1.14242e-05	3.00892e-07	3.95851e-07	5.40597e-07	4.04888e-07	9.27573e-07	4.95702e-07	0.00349095	0.00543073	0.00738736	0.00570621	0.00631781	0.0060849	0.00387583	0.00306019	0.00326338	0.00152182	1.68298e-06
13.75	1.21186e-06	9.74391e-06	3.80475e-05	9.99222e-06	1.04907e-06	2.34063e-07	1.30689e-07	6.11218e-08	7.88922e-07	4.84783e-06	6.14732e-05	7.42825e-06	1.58885e-07	3.62679e-07	5.04189e-07	3.78822e-07	9.53699e-07	7.01158e-07	0.00450833	0.0062117	0.007587	0.00351449	0.00588223	0.00455339	0.00539005	0.00204671	0.00552097	0.00205264	1.61526e-06
14	1.37302e-06	1.09586e-05	2.80906e-05	1.12439e-05	2.18986e-06	1.96771e-07	1.22841e-07	2.06124e-08	5.674e-07	6.93816e-06	5.99972e-05	6.52749e-06	6.06162e-07	3.09689e-07	5.76967e-07	7.66194e-07	8.3462e-07	5.7447e-07	0.00209525	0.00813678	0.00591101	0.00502589	0.00932529	0.00389078	0.00743668	0.00251913	0.00234738	0.00171948	1.36813e-06
14.25	1.26802e-06	5.87592e-06	3.61771e-05	8.35967e-06	6.80617e-07	2.79787e-07	1.42696e-07	5.95852e-08	7.91381e-07	6.88478e-06	2.29537e-06	7.54544e-06	9.87516e-07	4.27047e-07	7.85518e-07	5.39131e-07	1.20966e-06	4.86965e-08	0.00274722	0.00582313	0.00655896	0.00258331	0.00772394	0.00492299	0.00431606	0.00347764	0.00253228	0.00253133	2.2158e-06
14.5	1.09112e-06	6.68634e-06	3.51347e-05	6.06433e-06	2.04267e-06	2.05538e-07	1.51917e-07	1.99513e-07	1.00052e-06	7.32634e-06	6.97433e-05	7.72961e-06	6.93263e-07	5.02499e-07	3.65727e-07	7.60822e-07	7.98953e-07	4.72811e-07	0.00385222	0.0066234	0.00620601	0.00293781	0.00869185	0.00704649	0.00454397	0.00352999	0.0053441	0.00170232	1.72307e-06
14.75	1.18994e-06	1.00996e-05	3.257e-05	1.5826e-05	1.85009e-06	1.4647e-07	2.05537e-07	7.16686e-08	1.29514e-06	8.16235e-06	5.36087e-05	7.31127e-06	5.88776e-07	6.9179e-07	4.74307e-07	6.85766e-07	1.15497e-06	6.00099e-07	0.00347732	0.00535645	0.00465516	0.00592471	0.00793081	0.00730058	0.00635109	0.00367656	0.00267733	0.0029522	1.70602e-06
15	1.126e-06	8.76388e-06	2.63198e-05	1.3535e-05	2.14883e-06	3.08823e-07	3.3636e-07	1.16495e-07	7.28506e-07	7.07274e-06	6.80043e-05	6.3374e-06	4.24127e-07	4.34633e-07	4.77674e-07	5.71066e-07	1.00354e-06	1.16691e-07	0.00262357	0.00928895	0.00610865	0.0057022	0.00679386	0.0043062	0.00454693	0.00509158	0.00362981	0.001877	1.79741e-06
15.25	1.45715e-06	2.67635e-07	3.74678e-05	1.27612e-05	2.72016e-06	2.01449e-07	1.02189e-07	7.4587e-08	1.06148e-06	8.58814e-06	6.85863e-05	7.36548e-06	4.39194e-07	2.94007e-07	6.03033e-07	6.29882e-07	1.10308e-06	7.90778e-07	0.00354705	0.00818228	0.00544652	0.00589022	0.0050135	0.00464452	0.00587048	0.00180918	0.00345478	0.00211682	1.90312e-06
15.5	8.54269e-07	1.45322e-05	1.00848e-05	8.22347e-06	2.32386e-06	3.38582e-07	1.04363e-07	2.52502e-09	8.78129e-07	4.96196e-06	6.09957e-05	6.48211e-06	3.09901e-07	5.63094e-07	7.23309e-07	8.73073e-07	1.10444e-06	5.76488e-07	0.00249525	0.00629805	0.0079227	0.00434969	0.00610308	0.00592661	0.00702372	0.00219724	0.00335302	0.00320459	1.49901e-06
15.75	1.18976e-06	1.10697e-05	3.05791e-05	1.23386e-05	1.71142e-06	1.93765e-07	3.66181e-12	1.34752e-07	9.59645e-07	5.70542e-06	5.02509e-05	8.66403e-06	4.84824e-07	6.63821e-07	8.42489e-07	5.42204e-07	1.01955e-06	5.71561e-07	0.00262273	0.0072361	0.00711098	0.00542558	0.00801275	0.00530873	0.00559223	0.00324117	0.0029488	0.00236854	1.57496e-06
16	1.58306e-06	7.6924e-06	3.19486e-05	5.61615e-06	2.52802e-06	3.44486e-07	1.38013e-07	1.19172e-07	8.3344e-07	5.4983e-06	5.71841e-05	9.49741e-06	4.48401e-07	3.41559e-07	7.64178e-07	4.71487e-07	1.02965e-06	3.56455e-07	0.00551802	0.00815624	0.00698767	0.00482633	0.0092722	0.00590646	0.00529006	0.00377977	0.00254554	0.00141093	2.32633e-06
16.25	1.09384e-06	7.0335e-06	2.8996e-05	1.1121e-05	1.52852e-06	2.20416e-07	1.52432e-07	2.6351e-12	9.62312e-07	6.38225e-06	5.97589e-05	7.57087e-06	3.59039e-07	8.43114e-07	6.16069e-07	5.98599e-07	8.11649e-07	4.14969e-07	0.00410638	0.0105533	0.00752429	0.00395972	0.00620584	0.00306167	0.00516462	0.00198409	0.00507821	0.00145624	1.83813e-06
16.5	1.07009e-06	1.69565e-05	2.36297e-05	1.51313e-05	1.41743e-06	2.74235e-07	1.04861e-07	1.43423e-07	1.3345e-06	5.5837e-06	6.04623e-05	1.08092e-05	7.07391e-07	3.8945e-07	1.03031e-06	9.22369e-07	9.32041e-07	5.66331e-07	0.00329271	0.00581894	0.00644525	0.00385181	0.00860972	0.00737995	0.00536959	0.00222319	0.00324977	0.00243709	1.949e-06
16.75	1.60476e-06	6.1426e-06	2.38529e-05	1.90929e-05	2.03643e-06	2.60263e-07	2.01855e-07	1.16442e-07	1.02099e-06	1.0927e-05	5.95592e-05	9.44756e-06	3.81405e-07	5.14002e-07	4.15314e-07	6.19554e-07	8.85063e-07	1.37001e-07	0.00182778	0.00471144	0.00487067	0.00219067	0.00514751	0.00701236	0.00557691	0.00319953	0.00374772	0.00220537	2.03373e-06
17	2.00516e-06	7.10254e-06	3.47438e-05	9.23901e-06	1.79239e-06	2.71921e-07	1.08928e-07	1.14622e-07	1.09835e-06	8.46655e-06	6.63091e-05	9.15975e-06	5.46195e-07	5.3042e-07	4.44596e-07	6.48369e-07	1.21597e-06	5.03991e-08	0.00202783	0.00793408	0.00602537	0.00348715	0.0071743	0.00650602	0.00656801	0.00270871	0.00519618	0.00164973	2.02228e-06
17.25	4.87026e-06	9.19524e-06	4.52005e-05	1.84684e-05	2.03456e-06	2.83013e-07	1.9757e-07	2.70332e-12	6.80114e-07	7.41941e-06	6.21621e-05	-1.32268e-07	5.51368e-07	3.18712e-07	5.32544e-07	6.18427e-07	1.1963e-06	2.83687e-08	0.00306022	0.00793101	0.00847972	0.00541952	0.00720073	0.00654398	0.0058661	0.00261648	0.00322424	0.00289143	1.25742e-06

## Sheet: Computed_Temperature_FlameCP
Pos [m]	Temperature [K]
1e-99	333.15
0.000161921	334.542
0.000322269	336.211
0.000478101	338.161
0.000625317	340.358
0.000762406	342.765
0.000889644	345.36
0.00100737	348.115
0.00111648	351.01
0.00121813	354.034
0.00131342	357.184
0.00140319	360.455
0.00148807	363.839
0.00156862	367.33
0.00164532	370.923
0.00171861	374.615
0.00178885	378.403
0.00185631	382.281
0.00192119	386.242
0.00198373	390.281
0.00204417	394.398
0.00210266	398.589
0.0021593	402.844
0.00221411	407.151
0.00226708	411.493
0.00231829	415.866
0.00236783	420.261
0.00241569	424.666
0.00246182	429.06
0.0025062	433.425
0.00254892	437.758
0.00259016	442.064
0.00263008	446.346
0.00266879	450.608
0.00270639	454.85
0.00274295	459.073
0.00277853	463.275
0.00281323	467.462
0.00284716	471.638
0.00288037	475.808
0.00291294	479.973
0.00294491	484.138
0.00297634	488.307
0.00300728	492.48
0.00303777	496.663
0.00306788	500.86
0.00309761	505.068
0.00312692	509.28
0.00315572	513.48
0.00318394	517.653
0.00321154	521.79
0.00323853	525.889
0.00326498	529.956
0.00329096	533.999
0.00331652	538.024
0.00334173	542.038
0.00336663	546.047
0.00339127	550.056
0.00341569	554.072
0.00343993	558.101
0.00346402	562.146
0.00348801	566.213
0.00351191	570.306
0.00353575	574.428
0.00355955	578.581
0.00358332	582.767
0.00360706	586.986
0.00363078	591.24
0.0036545	595.53
0.00367822	599.858
0.00370195	604.225
0.00372573	608.636
0.0037496	613.103
0.00377364	617.636
0.00379788	622.246
0.00382237	626.938
0.00384705	631.706
0.00387178	636.52
0.00389631	641.331
0.00392042	646.093
0.00394402	650.79
0.00396716	655.426
0.00398992	660.015
0.00401238	664.571
0.0040346	669.108
0.00405664	673.634
0.00407853	678.156
0.00410027	682.673
0.00412185	687.181
0.00414325	691.676
0.00416447	696.159
0.00418552	700.63
0.00420641	705.093
0.00422716	709.547
0.00424775	713.987
0.00426815	718.411
0.00428837	722.815
0.00430842	727.202
0.00432831	731.576
0.00434807	735.94
0.00436772	740.297
0.00438727	744.65
0.00440675	749.005
0.00442617	753.365
0.00444556	757.736
0.00446494	762.12
0.00448431	766.52
0.00450369	770.937
0.00452307	775.372
0.00454248	779.827
0.0045619	784.303
0.00458134	788.799
0.0046008	793.314
0.00462026	797.844
0.00463973	802.391
0.0046592	806.954
0.00467869	811.535
0.00469821	816.137
0.00471777	820.763
0.0047374	825.417
0.0047571	830.106
0.0047769	834.832
0.00479684	839.604
0.00481692	844.425
0.00483717	849.301
0.00485762	854.236
0.00487826	859.236
0.00489913	864.303
0.00492022	869.438
0.00494155	874.643
0.0049631	879.919
0.0049849	885.267
0.00500693	890.687
0.00502919	896.177
0.00505169	901.737
0.00507439	907.362
0.00509729	913.05
0.00512038	918.795
0.00514364	924.595
0.00516705	930.446
0.00519061	936.346
0.00521432	942.292
0.00523816	948.283
0.00526213	954.317
0.00528624	960.395
0.00531047	966.514
0.00533482	972.676
0.00535929	978.875
0.00538384	985.103
0.00540844	991.352
0.00543307	997.614
0.00545772	1003.89
0.00548241	1010.18
0.00550718	1016.49
0.00553206	1022.84
0.00555707	1029.23
0.00558218	1035.64
0.00560738	1042.08
0.00563266	1048.55
0.00565799	1055.03
0.00568335	1061.52
0.00570868	1068
0.00573394	1074.46
0.0057591	1080.91
0.00578416	1087.33
0.00580913	1093.72
0.005834	1100.09
0.00585877	1106.43
0.00588342	1112.75
0.00590795	1119.04
0.00593232	1125.29
0.00595653	1131.49
0.00598058	1137.66
0.00600449	1143.79
0.00602825	1149.89
0.00605189	1155.96
0.00607542	1162
0.00609885	1168.02
0.00612218	1174.02
0.00614544	1180
0.00616862	1185.97
0.00619172	1191.92
0.00621476	1197.86
0.00623773	1203.78
0.00626065	1209.7
0.00628349	1215.6
0.00630625	1221.48
0.00632888	1227.34
0.00635138	1233.16
0.00637373	1238.95
0.00639591	1244.71
0.00641793	1250.42
0.00643981	1256.11
0.00646157	1261.77
0.00648323	1267.41
0.00650479	1273.02
0.00652624	1278.62
0.00654758	1284.19
0.00656881	1289.73
0.00658992	1295.25
0.00661088	1300.74
0.00663171	1306.2
0.0066524	1311.63
0.00667293	1317.02
0.00669329	1322.38
0.00671347	1327.69
0.00673343	1332.95
0.00675316	1338.16
0.00677263	1343.3
0.0067918	1348.37
0.00681066	1353.36
0.00682918	1358.27
0.00684737	1363.1
0.00686523	1367.85
0.00688278	1372.52
0.00690005	1377.12
0.00691707	1381.65
0.00693386	1386.13
0.00695043	1390.57
0.00696683	1394.95
0.00698306	1399.3
0.00699916	1403.61
0.00701514	1407.9
0.007031	1412.16
0.00704675	1416.39
0.0070624	1420.6
0.00707795	1424.78
0.00709343	1428.95
0.00710883	1433.1
0.00712416	1437.24
0.00713942	1441.35
0.00715461	1445.46
0.00716975	1449.55
0.00718483	1453.62
0.00719988	1457.69
0.00721489	1461.75
0.0072299	1465.81
0.0072449	1469.87
0.0072599	1473.93
0.0072749	1477.99
0.00728992	1482.05
0.00730494	1486.12
0.00731998	1490.2
0.00733505	1494.28
0.00735013	1498.36
0.00736524	1502.46
0.00738039	1506.56
0.0073956	1510.68
0.00741087	1514.82
0.00742623	1518.98
0.00744169	1523.18
0.00745726	1527.4
0.00747295	1531.66
0.00748878	1535.95
0.00750476	1540.3
0.00752091	1544.68
0.00753723	1549.12
0.00755373	1553.61
0.00757042	1558.16
0.0075873	1562.77
0.00760438	1567.43
0.00762164	1572.15
0.00763908	1576.94
0.0076567	1581.78
0.00767449	1586.68
0.00769246	1591.63
0.0077106	1596.66
0.00772892	1601.75
0.00774743	1606.9
0.00776611	1612.13
0.00778493	1617.42
0.00780388	1622.76
0.00782292	1628.16
0.00784206	1633.61
0.00786128	1639.11
0.00788058	1644.66
0.00789995	1650.27
0.00791938	1655.93
0.00793889	1661.63
0.00795847	1667.4
0.00797815	1673.23
0.00799795	1679.13
0.00801788	1685.1
0.00803796	1691.16
0.00805818	1697.29
0.00807854	1703.49
0.00809902	1709.77
0.00811961	1716.11
0.0081403	1722.52
0.00816109	1728.98
0.008182	1735.51
0.00820302	1742.09
0.00822417	1748.73
0.00824547	1755.44
0.00826694	1762.21
0.00828863	1769.06
0.00831056	1775.98
0.00833278	1783.01
0.00835535	1790.13
0.00837831	1797.36
0.00840169	1804.7
0.00842552	1812.17
0.00844989	1819.77
0.00847483	1827.51
0.0085004	1835.4
0.0085267	1843.46
0.00855383	1851.7
0.00858186	1860.15
0.00861088	1868.81
0.00864099	1877.7
0.00867228	1886.83
0.00870484	1896.21
0.00873876	1905.85
0.00877411	1915.76
0.00881094	1925.92
0.00884925	1936.33
0.00888906	1946.96
0.00893035	1957.8
0.00897309	1968.82
0.00901723	1979.99
0.00906268	1991.28
0.00910943	2002.66
0.00915739	2014.09
0.00920651	2025.55
0.00925678	2037.02
0.00930814	2048.46
0.00936063	2059.87
0.00941437	2071.22
0.00946942	2082.52
0.00952589	2093.74
0.00958388	2104.86
0.00964319	2115.79
0.00970351	2126.42
0.00976455	2136.67
0.00982609	2146.44
0.00988789	2155.65
0.00994954	2164.23
0.0100106	2172.07
0.0100707	2179.14
0.0101298	2185.45
0.0101882	2191.01
0.010246	2195.84
0.0103032	2199.96
0.0103601	2203.39
0.0104168	2206.14
0.0104735	2208.22
0.0105302	2209.64
0.010587	2210.41
0.0106439	2210.53
0.0107011	2210.03
0.0107589	2208.91
0.0108174	2207.17
0.0108772	2204.82
0.0109384	2201.83
0.0110015	2198.2
0.011067	2193.89
0.0111354	2188.86
0.0112073	2183.04
0.0112837	2176.35
0.0113656	2168.67
0.0114549	2159.8
0.0115538	2149.44
0.0116655	2137.19
0.0117963	2122.22
0.0119496	2103.95
0.0121273	2081.94
0.012328	2056.11
0.0125419	2027.56
0.0127586	1997.61
0.0129742	1966.88
0.0131886	1935.41
0.0134028	1903.14
0.0136171	1870.05
0.0138321	1836.11
0.0140499	1801.01
0.014274	1764.19
0.0145076	1725.12
0.0147513	1683.69
0.0150023	1640.33
0.015257	1595.71
0.0155125	1550.31
0.0157685	1504.25
0.0160268	1457.22
0.0162913	1408.58
0.0165666	1357.5
0.0168568	1303.28
0.0171645	1245.53
0.0174915	1184.08
0.0178396	1118.8
0.0182121	1049.37
0.0186121	975.486
0.019035	898.226
0.0194647	820.594
0.0198817	745.935
0.0202697	677.011
0.0206188	615.595
0.0209332	561.14
0.0212273	511.399
0.0215136	464.546
0.0218007	419.858
0.0220951	377.226
0.022397	337.811
0.0227	303.15

## Sheet: Computed_Temperature_FlameCPME
Pos [m]	Temperature [K]
1e-99	333.15
0.000146544	333.998
0.000291053	334.997
0.000430449	336.14
0.000562377	337.414
0.000685491	338.799
0.000799636	340.277
0.000906164	341.847
0.00100597	343.507
0.00109998	345.256
0.00118884	347.092
0.00127317	349.014
0.0013535	351.02
0.00143033	353.113
0.0015041	355.294
0.00157512	357.562
0.00164371	359.921
0.00171004	362.368
0.00177441	364.906
0.00183695	367.534
0.00189786	370.255
0.00195727	373.067
0.00201527	375.971
0.00207191	378.962
0.00212723	382.037
0.00218121	385.189
0.00223385	388.41
0.00228515	391.693
0.00233513	395.032
0.00238381	398.418
0.0024312	401.847
0.00247734	405.311
0.00252222	408.802
0.00256587	412.315
0.00260827	415.839
0.00264948	419.373
0.00268956	422.912
0.00272852	426.453
0.00276646	429.995
0.00280342	433.535
0.00283945	437.072
0.00287463	440.611
0.00290904	444.15
0.00294275	447.693
0.00297583	451.244
0.00300833	454.804
0.00304031	458.377
0.00307181	461.962
0.00310289	465.565
0.00313357	469.184
0.00316389	472.824
0.00319389	476.483
0.00322358	480.166
0.003253	483.873
0.00328213	487.601
0.00331096	491.348
0.00333947	495.106
0.00336759	498.868
0.00339532	502.628
0.00342262	506.379
0.0034495	510.121
0.00347597	513.854
0.00350208	517.58
0.00352786	521.303
0.00355332	525.022
0.00357852	528.745
0.00360351	532.476
0.0036283	536.218
0.00365294	539.975
0.00367742	543.747
0.00370181	547.54
0.00372611	551.358
0.00375034	555.202
0.00377452	559.073
0.00379863	562.971
0.00382269	566.896
0.00384671	570.851
0.00387069	574.834
0.00389465	578.849
0.00391861	582.897
0.00394256	586.979
0.00396652	591.095
0.00399049	595.247
0.00401448	599.436
0.00403851	603.666
0.00406262	607.942
0.00408683	612.269
0.00411116	616.65
0.0041356	621.084
0.00416008	625.557
0.00418447	630.047
0.00420863	634.525
0.0042325	638.979
0.00425608	643.408
0.00427939	647.814
0.00430246	652.202
0.00432534	656.578
0.00434807	660.952
0.00437069	665.329
0.0043932	669.71
0.0044156	674.092
0.00443789	678.475
0.00446005	682.856
0.00448209	687.235
0.00450401	691.614
0.00452582	695.991
0.00454751	700.366
0.00456906	704.735
0.00459047	709.095
0.00461171	713.442
0.0046328	717.776
0.00465373	722.097
0.00467452	726.407
0.00469518	730.707
0.00471573	735.001
0.00473617	739.291
0.00475656	743.584
0.0047769	747.887
0.00479724	752.201
0.00481756	756.529
0.00483788	760.873
0.00485822	765.234
0.00487856	769.612
0.00489892	774.009
0.0049193	778.423
0.00493968	782.853
0.00496006	787.298
0.00498045	791.756
0.00500085	796.231
0.00502126	800.721
0.0050417	805.231
0.00506219	809.764
0.00508276	814.328
0.00510342	818.927
0.00512421	823.564
0.00514513	828.245
0.00516623	832.978
0.00518755	837.773
0.00520909	842.632
0.00523087	847.557
0.0052529	852.552
0.0052752	857.621
0.0052978	862.77
0.00532068	867.996
0.00534381	873.295
0.0053672	878.664
0.00539085	884.104
0.00541476	889.616
0.00543894	895.204
0.0054634	900.869
0.00548812	906.607
0.00551311	912.417
0.00553835	918.297
0.00556385	924.247
0.00558958	930.264
0.00561556	936.349
0.00564178	942.5
0.00566823	948.713
0.00569488	954.983
0.00572173	961.308
0.00574878	967.689
0.00577601	974.122
0.00580344	980.607
0.00583103	987.141
0.00585878	993.717
0.00588665	1000.33
0.00591462	1006.96
0.00594272	1013.63
0.005971	1020.35
0.00599942	1027.11
0.00602788	1033.87
0.00605628	1040.62
0.00608455	1047.35
0.00611269	1054.04
0.0061407	1060.7
0.00616861	1067.34
0.00619638	1073.94
0.00622401	1080.51
0.00625147	1087.04
0.00627874	1093.52
0.00630583	1099.95
0.00633274	1106.35
0.00635949	1112.7
0.00638611	1119.03
0.00641261	1125.32
0.006439	1131.59
0.0064653	1137.83
0.00649153	1144.06
0.0065177	1150.27
0.00654381	1156.47
0.00656988	1162.66
0.00659592	1168.85
0.00662193	1175.02
0.00664793	1181.2
0.00667393	1187.38
0.00669992	1193.56
0.00672591	1199.74
0.0067519	1205.92
0.00677789	1212.11
0.00680386	1218.29
0.00682982	1224.47
0.00685574	1230.64
0.00688163	1236.81
0.00690746	1242.97
0.00693322	1249.12
0.00695887	1255.23
0.00698439	1261.33
0.00700975	1267.38
0.00703496	1273.41
0.00706002	1279.39
0.00708491	1285.35
0.00710963	1291.27
0.00713419	1297.14
0.00715856	1302.98
0.00718268	1308.76
0.00720651	1314.48
0.00722998	1320.11
0.00725302	1325.64
0.00727557	1331.06
0.00729765	1336.37
0.00731929	1341.58
0.0073405	1346.69
0.00736132	1351.71
0.00738176	1356.64
0.00740187	1361.49
0.00742167	1366.28
0.00744121	1371
0.0074605	1375.67
0.00747954	1380.28
0.00749836	1384.85
0.00751696	1389.36
0.00753538	1393.83
0.00755363	1398.27
0.00757172	1402.67
0.00758969	1407.04
0.00760754	1411.38
0.0076253	1415.71
0.00764299	1420.03
0.00766065	1424.34
0.00767828	1428.64
0.00769589	1432.95
0.0077135	1437.25
0.00773109	1441.56
0.00774868	1445.86
0.00776625	1450.17
0.00778382	1454.48
0.0078014	1458.79
0.00781897	1463.1
0.00783655	1467.42
0.00785414	1471.74
0.00787176	1476.07
0.00788941	1480.41
0.00790709	1484.76
0.00792482	1489.12
0.0079426	1493.51
0.00796045	1497.9
0.00797837	1502.33
0.0079964	1506.78
0.00801454	1511.26
0.00803282	1515.77
0.00805125	1520.33
0.00806986	1524.94
0.00808864	1529.59
0.0081076	1534.3
0.00812673	1539.05
0.00814603	1543.85
0.00816552	1548.71
0.00818518	1553.62
0.00820503	1558.58
0.00822504	1563.59
0.00824517	1568.64
0.0082654	1573.73
0.0082857	1578.85
0.00830605	1584
0.00832642	1589.17
0.00834682	1594.36
0.00836727	1599.58
0.00838776	1604.84
0.00840831	1610.12
0.00842893	1615.45
0.00844961	1620.81
0.00847036	1626.22
0.00849118	1631.67
0.00851207	1637.16
0.00853303	1642.69
0.00855406	1648.28
0.00857519	1653.91
0.00859642	1659.61
0.00861776	1665.36
0.00863921	1671.17
0.0086608	1677.05
0.00868253	1682.99
0.00870444	1689.02
0.00872654	1695.13
0.00874886	1701.32
0.00877142	1707.61
0.00879425	1714.01
0.00881738	1720.51
0.00884084	1727.13
0.00886464	1733.86
0.00888883	1740.73
0.00891343	1747.73
0.00893848	1754.86
0.00896403	1762.15
0.00899009	1769.58
0.00901671	1777.18
0.00904397	1784.94
0.00907192	1792.88
0.00910065	1801.03
0.00913023	1809.38
0.00916074	1817.95
0.00919224	1826.74
0.00922479	1835.76
0.00925845	1845.01
0.00929328	1854.48
0.00932932	1864.19
0.00936658	1874.1
0.00940507	1884.21
0.00944477	1894.49
0.00948568	1904.93
0.00952776	1915.51
0.00957097	1926.19
0.00961526	1936.96
0.00966059	1947.79
0.00970691	1958.65
0.00975418	1969.54
0.00980238	1980.43
0.00985152	1991.32
0.0099016	2002.19
0.00995263	2013.03
0.0100046	2023.83
0.0100574	2034.56
0.010111	2045.17
0.0101652	2055.64
0.0102201	2065.94
0.0102757	2076.06
0.0103318	2085.96
0.0103884	2095.62
0.0104456	2105.01
0.0105033	2114.09
0.0105615	2122.83
0.0106201	2131.21
0.0106792	2139.18
0.0107387	2146.73
0.0107987	2153.8
0.0108591	2160.36
0.0109199	2166.38
0.0109808	2171.79
0.011042	2176.57
0.0111032	2180.7
0.0111647	2184.15
0.0112264	2186.91
0.0112888	2188.96
0.0113519	2190.3
0.0114161	2190.89
0.0114821	2190.71
0.0115503	2189.7
0.0116217	2187.77
0.0116972	2184.82
0.0117783	2180.67
0.0118665	2175.12
0.0119637	2167.88
0.012072	2158.61
0.0121939	2146.94
0.0123321	2132.42
0.01249	2114.55
0.0126702	2092.89
0.0128711	2067.52
0.0130849	2039.36
0.0133024	2009.67
0.0135187	1979.19
0.0137335	1948.06
0.0139477	1916.22
0.0141618	1883.65
0.0143762	1850.34
0.0145915	1816.22
0.0148096	1781.05
0.0150328	1744.42
0.0152634	1706
0.0155023	1665.55
0.0157498	1623.01
0.0160041	1578.62
0.0162629	1532.75
0.0165264	1485.38
0.016797	1436.05
0.0170792	1383.94
0.0173795	1327.9
0.0177034	1266.93
0.0180526	1200.85
0.018427	1129.93
0.0188272	1054.4
0.0192534	974.507
0.0197036	890.821
0.020169	804.907
0.0206315	719.808
0.021071	638.989
0.0214802	564.02
0.0218677	493.841
0.0222463	426.923
0.0226232	363.195
0.023	303.15
